# Supplementary figures and images for: Oncolytic adenovirus shapes the ovarian tumor microenvironment for potent tumor-infiltrating lymphocyte tumor reactivity
Source: PubMed Central journal article supplement — J Immunother Cancer. 2020 Jan 13;8(1):e000188. doi: 10.1136/jitc-2019-000188 (PMC7057530; doi:10.1136/jitc-2019-000188), 2020-01-13

## Supplementary Figure 1

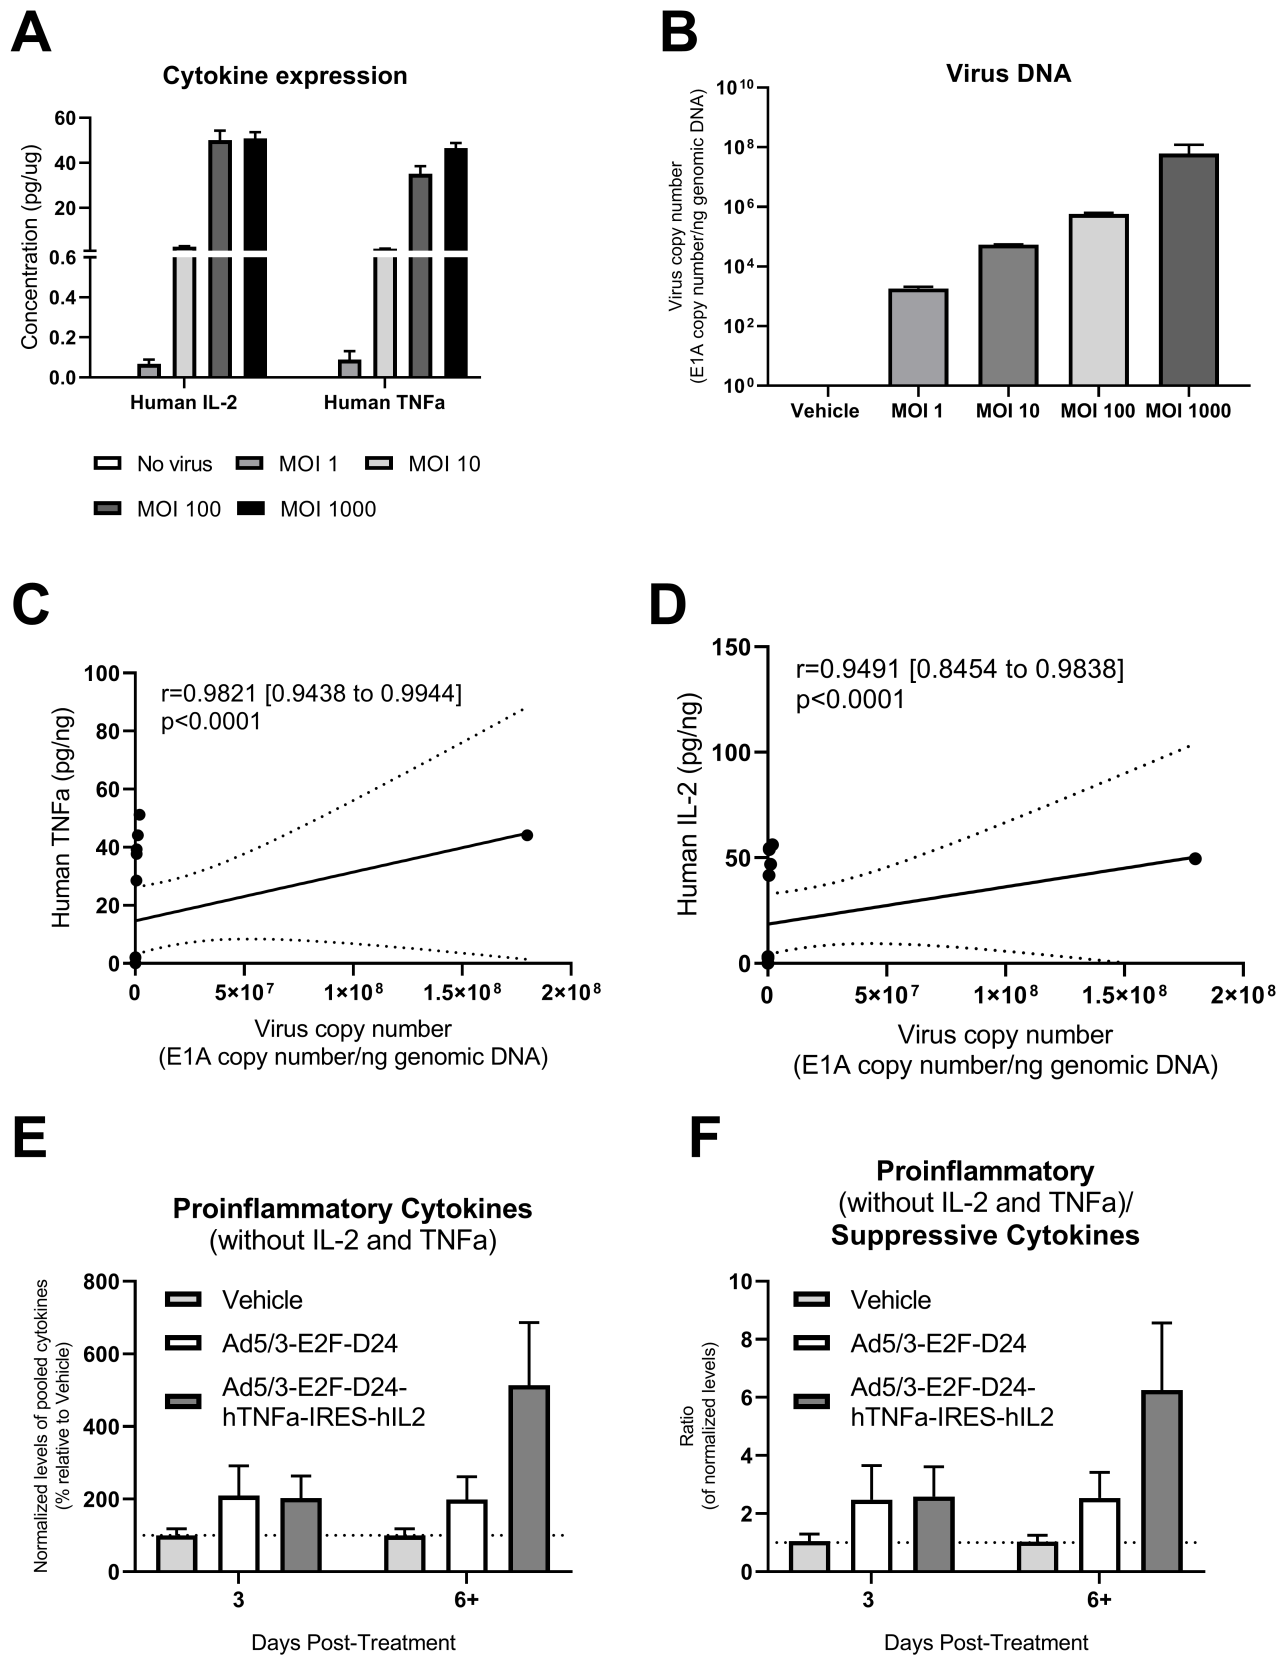

Supplement: jitc-2019-000188supp001.pdf [file jitc-2019-000188supp001.pdf]

## Supplementary Figure 2

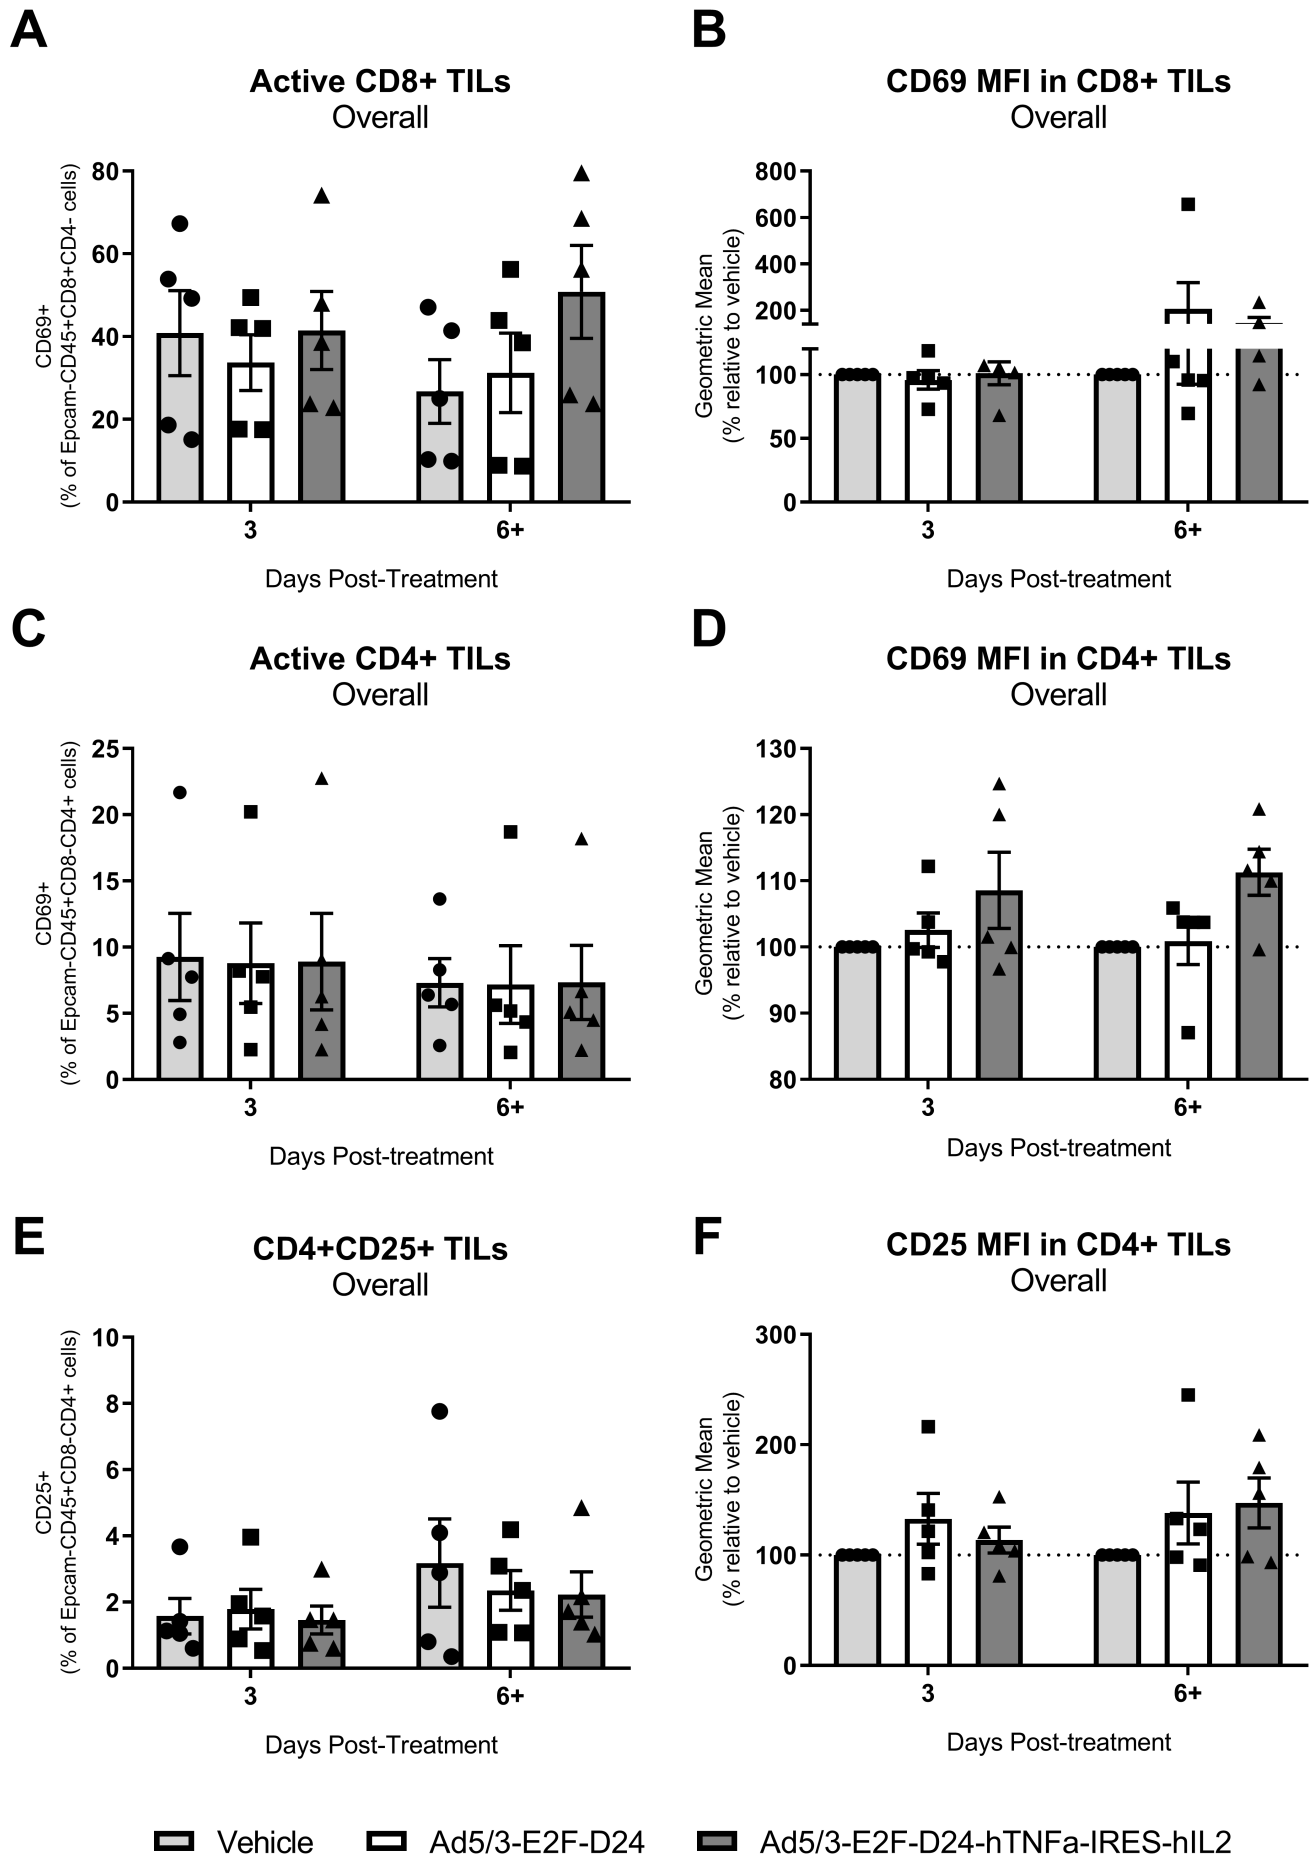

Supplement: jitc-2019-000188supp002.pdf [file jitc-2019-000188supp002.pdf]

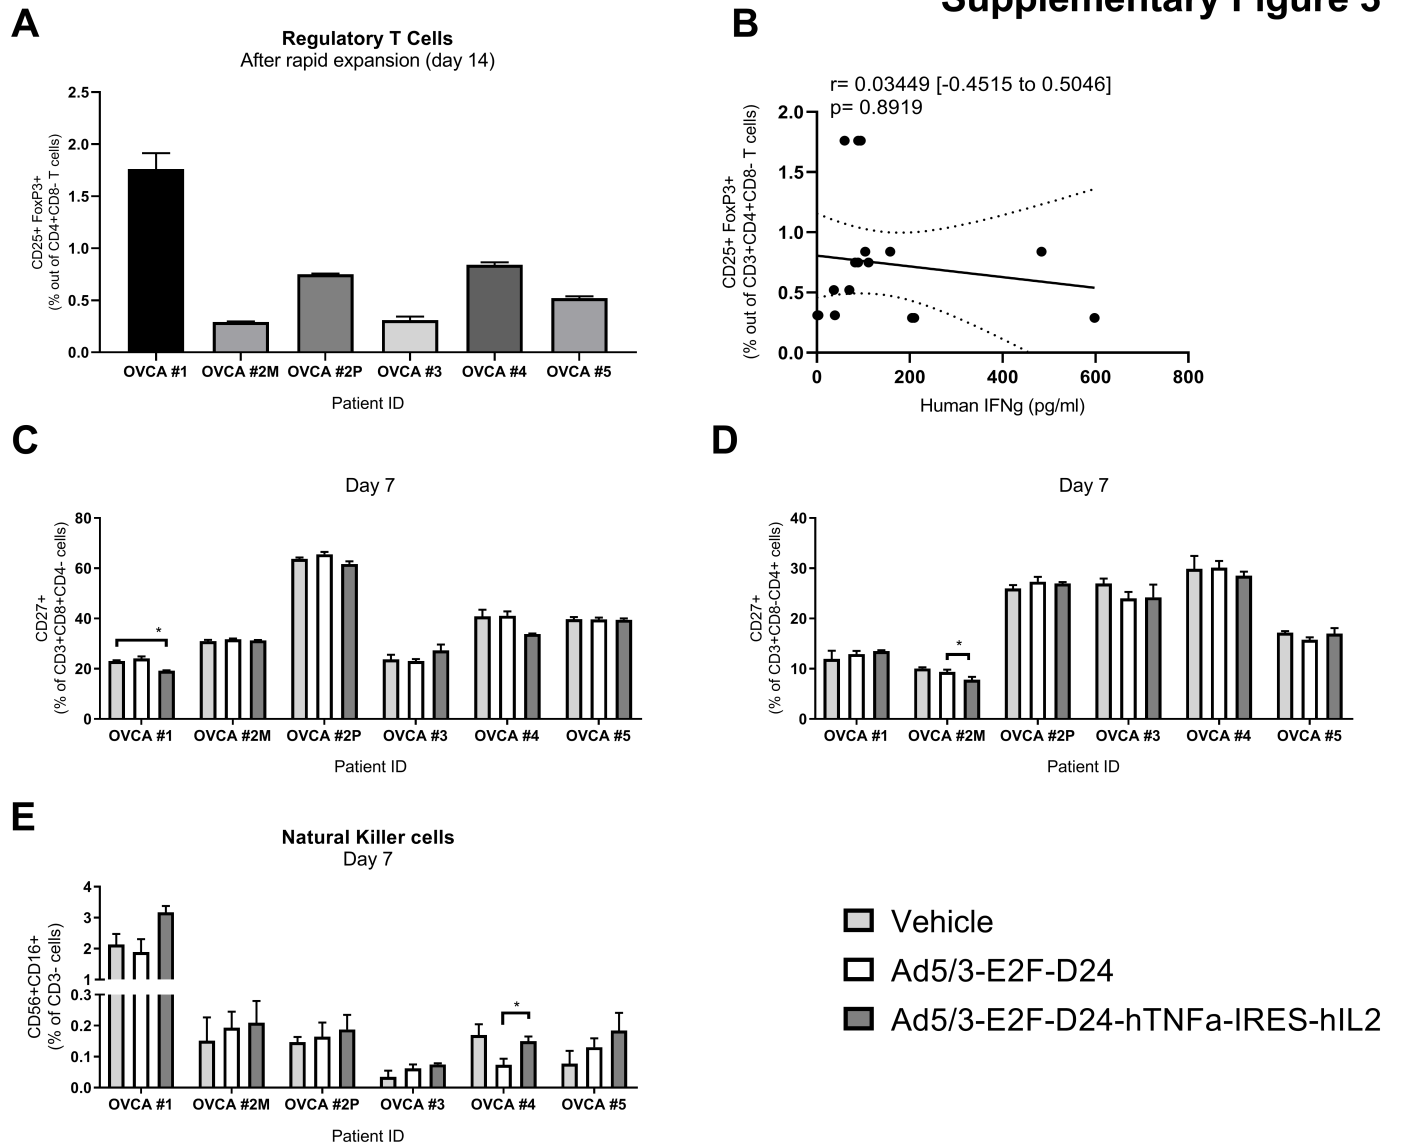

Supplement: jitc-2019-000188supp003.pdf [file jitc-2019-000188supp003.pdf]

## Supplementary Figure 4

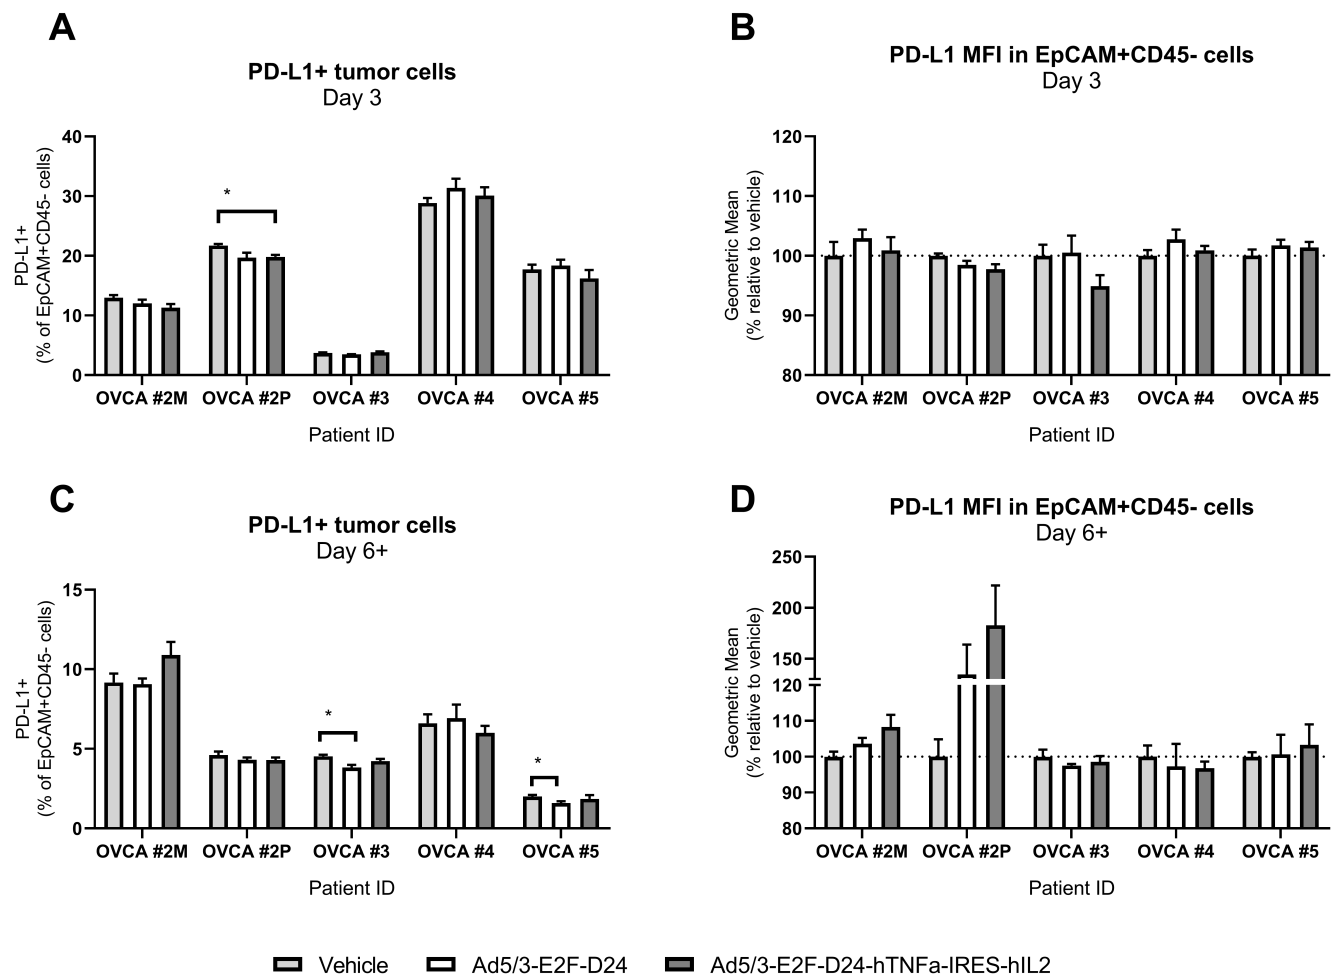

Supplement: jitc-2019-000188supp004.pdf [file jitc-2019-000188supp004.pdf]

## Supplementary Figure 5

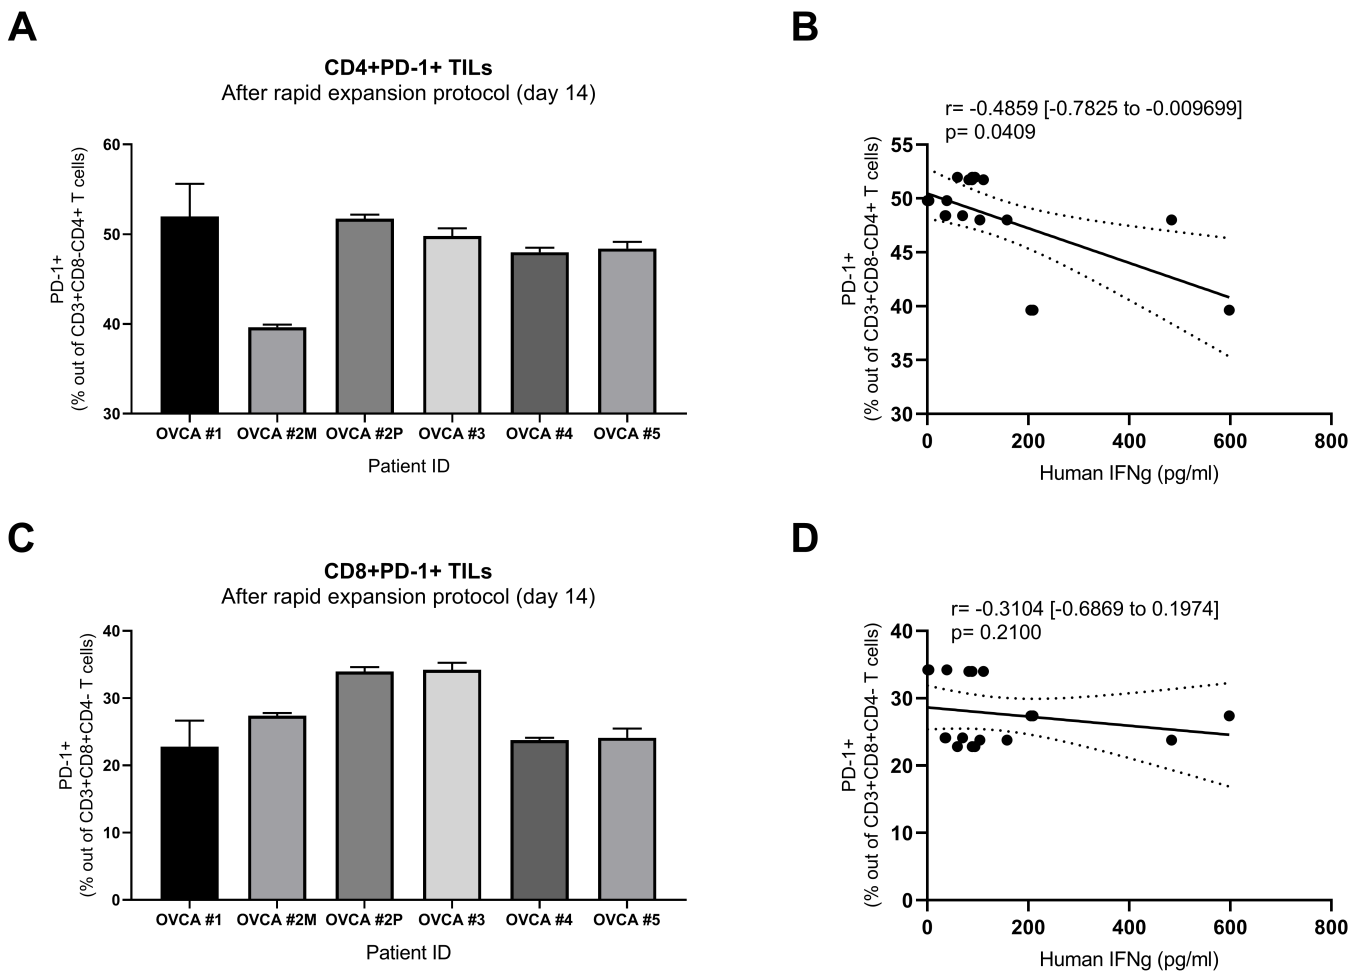

Supplement: jitc-2019-000188supp005.pdf [file jitc-2019-000188supp005.pdf]
